# Supplementary material for: Faecal metabolome and its determinants in inflammatory bowel disease
Source: PubMed Central journal article supplement — Gut. 2023 Mar 23;72(8):1472–85. doi: 10.1136/gutjnl-2022-328048 (PMC10359577; doi:10.1136/gutjnl-2022-328048), 2023-03-23
Supplement: gutjnl-2022-328048supp001.pdf [file gutjnl-2022-328048supp001.pdf]

## SUPPLEMENTARY METHODS

### Sample collection

Sample collection took place between 2014-2017. Participants were asked to collect and freeze the faecal samples at home and were picked up and transported on dry ice and stored at  $-80^{\circ}\text{C}$  within 24 h after collection. For this study, fresh frozen samples were drilled on dry ice until obtaining on average 0.5 mg of faecal material, transferred into a 2ml tube and finally shipped to Metabolon facilities for metabolomic measurements. Samples from the LifeLines and 1000IBD cohorts were collected using the same protocol and processed by the same lab technician.

### Metabolite's quantification

Metabolomics measurements were performed by Metabolon Inc. (North Carolina, U.S.A.). In short, proteins and organic solvent were removed from each sample. Next, each sample was divided into four fractions for analysis: two for analysis by two separate reverse phases (RP)/UPLC-MS/MS methods with positive ion mode electrospray ionisation (ESI), one for analysis by RP/UPLC-MS/MS with negative ion mode ESI, one for analysis by HILIC/UPLC-MS/MS with negative ion mode ESI. Raw data processing and quality control were performed according to Metabolon's standards.

In addition to untargeted metabolomics, the concentration of eight short-chain and branched-chain fatty acids. i.e., acetic acid (C2), propionic acid (C3), isobutyric acid (C4), butyric acid (C4), 2-methyl-butyric acid (C5), isovaleric acid (C5), valeric acid (C5) and caproic acid (hexanoic acid, C6), were measured using LC-MS/MS methods. Acetic acid was the most abundant SCFA in the faecal samples (mean: 2339  $\mu\text{g/g}$ , s.d. 1,131  $\mu\text{g/g}$ ), followed by butyrate (mean: 1,072.5  $\mu\text{g/g}$ , s.d. 678  $\mu\text{g/g}$ ) and propionate (mean: 955.58  $\mu\text{g/g}$ , s.d. 515.8  $\mu\text{g/g}$ ), while hexanoic acid presented the lowest concentrations (mean 74  $\mu\text{g/g}$ , s.d. 110  $\mu\text{g/g}$ ).

### Phenotypes selection

We retrieved the metadata including 180 entries consisting of dietary habits, medication and anthropomorphic measurements overlapping in both cohorts and 33

and 13 phenotypes specific to the IBD and the control cohorts, respectively. This information was included in further analyses if each category had at least 10 entries. A complete list of phenotypes is provided in **Supplementary Table 1**. Samples from patients with colectomy or stomas at the time of sample collection were removed from our analysis since their faecal samples are not representative of the content of the whole intestinal tract (n=68).

To adjust for differences in intestinal transit time, we combined the information about “bowel movements per day” present in the control cohort with questionnaires on the type of stools and frequencies a day in the IBD cohort. In the group of patients with IBD, disease remission or flare was defined using a combination of biomarkers, i.e., faecal calprotectin above 200 µg/g and Harvey-Bradshaw index >4 or Simple Clinical Colitis Activity Index (SCCAI) >2.5, and colonoscopy reports when available<sup>1</sup>.

Dietary intake was assessed through a validated food frequency questionnaire (FFQ) collected concurrently with faecal samples as described before<sup>2,3</sup>. Estimated food and nutrient intakes were adjusted by total caloric intake using regression analysis described in<sup>4</sup>. In addition, nutrient ratios and dietary patterns were calculated using pre-defined scoring systems:

- **Lifelines Protein score**, reflecting a higher protein energy percentage within the acceptable macronutrient distribution range for protein and a higher plant to animal protein ratio.
- **Lifelines Diet score**, expressing relative dietary quality with a higher score reflecting a high intake of vegetables, fruits, nuts, legumes and fish and lower intakes of red and processed meats and high sugar snacks and beverages.
- **Plant-to-Animal protein ratio**, reflecting a higher intake of plant protein relative to animal protein

### **Metabolite ratios calculation**

In addition to individual metabolites, we calculated the ratios between molecules of interest. Ratios were calculated by dividing the raw metabolite's levels, log transforming and scaling the resulting value.

In total, we evaluated 12 different ratios. The ratio between primary and secondary bile acids (deoxycholate/choleate, lithocholate/chenodeoxycholate,

ursodeoxycholate/chenodeoxycholate), the ratio between conjugated and unconjugated bile acids (glycol + tauro bile acids / unconjugated bile acid), the ratios between kynurenine, tryptamine, serotonin and tryptophan and the ratios between omega-3 PUFA and omega-6 PUFA. In our dataset, we could quantify the levels of docosahexanoate (DHA), docopentaenoate (DPA), eicosapentaenoate (EPA), hexadecatrienoate and stearidonate as omega-3 PUFAs, and arachidonate, dihomolinoleate, dihomolinolenate, docosadienoate, hexadecadienoate and linoleate as omega-6 PUFAs.

### **Prediction of microbial abundance**

Metagenomic reads mapping to the human genome were removed and reads containing Illumina adapters were trimmed using *KneadData* (v0.4.6.1)<sup>5</sup>. Other potential contaminants were also filtered out using *Kraken2*<sup>6</sup> and the NCBI UniVec database, with the confidence parameter set to 0.5. After quality control of the sequenced reads, the microbial taxonomic and functional profiles were determined using *MetaPhlAn* (v3.0)<sup>5</sup>. Moreover, *HUMANN 3.0* pipeline was used to estimate the metabolic potential of each microbial community<sup>5</sup>.

Three samples from patients with IBD were removed due to failure in the identification of bacterial species in their faecal sample. Previous to statistical tests, bacterial and pathway abundances were transformed using a centred-log ratio approach (CLR). Bacterial species and pathways present in more than 20% of the samples were kept for further analysis.

### **Estimation of bacterial metabolic gene clusters in metagenomic samples**

Metagenomic reads were aligned to a collection of predicted metabolic gene clusters (MGC) predicted using GutSMASH<sup>7</sup>. BiG-MAP<sup>8</sup> pipeline, with its default parameters, was used for read mapping and coverage calculations. In total, 6083 MGC were found in our dataset, for which, 1102 were kept after filtering for minimum coverage of 5% in the core genes of each cluster. To summarise the overall metabolic capacity of the microbial community, MGC were collapsed according to their predicted function by summing RPKM values. For example, the 5 different bai operons found in *Dorea sp. D27*, *Dorea sp AF36-15-AT*, *Clostridium scidens* (ATC 35704), *Clostridium hylemonae*

(*DSM 15053*) and *Clostridium hiranonis* (*DSM 13275*) genomes, were merged into one *bai* operon category.

Centred log-ratio transformation was applied before data analysis. In total, 136 pathways were identified and 134 were kept for analysis after removing pathways that were present in less than 20% of the samples: “lysine degradation acetate to butyrate” and a “nitrate reductase”.

### **Definition of dysbiosis**

Samples were defined as “dysbiotic” based on the microbiota composition in a similar way as described in Lloyd-Price et al.<sup>9</sup>. Euclidean distances between samples were computed on a clr-transformed bacterial abundances matrix. Non-IBD samples were used as a reference of eubiosis. Then, we computed the median distance between each sample and this reference group. A threshold for dysbiosis was defined at the 95<sup>th</sup> quantile of the median distances between non-IBD samples. Samples exceeding this threshold were considered dysbiotic.

### **Genome-wide association analysis power analysis**

Power estimations were conducted as described here<sup>10</sup>. First the relation between sample size and detection power was calculated while taking a grid search in the variance explained by the SNP (0.0~0.1). We then calculated the effects of metabolite detection rates (10%~100%) on the statistical power. The sample size in this study allowed us to have 80% power to detect genetic associations with 8% trait variation. The genetic effect of variants located in the NAT2 gene can explain 8% of the 5-acetylamino-6-amino-3-methyluracil variation (a metabolite with ~99% of prevalence in both IBD and controls) (**Suppl. Figure 8**).

### **Defining host genetics combining whole-exome sequencing (WES) and global screening array (GSA)**

Library preparation, sequencing and variant calling were done at the Broad Institute of the Massachusetts Institute of Technology (MIT) and Harvard University. On average, 86.06 million high-quality reads were generated per sample and 98.85% of reads were aligned to a human reference genome (hg19). Moreover, 81% of the exonic regions were covered with a read depth >30x. Next, the Genome Analysis Toolkit (GATK) was

used for variant calling<sup>11</sup>. Variants with a call rate <0.99 or Hardy-Weinberg equilibrium  $\chi^2$  test with p-value<0.0001 were excluded using PLINK 1.9<sup>12</sup>

GSA data was generated using the Infinium GSA-24 v1.0 BeadChip combined with the optional multi-Disease drop-in panel. Genotypes were called using OptiCall, QC steps were performed using PLINK 1.9 (variants with minor allele frequency (MAF) < 5%, call rate < 0.99 or Hardy-Weinberg equilibrium  $\chi^2$  test p-value<0.0001). Genotype data were phased using the Eagle<sup>13</sup> and imputed to the Haplotype Reference Consortium reference panel using the Michigan Imputation Server<sup>14</sup>. After imputation, genetic variants were filtered for imputation quality  $R^2 > 0.4$ . GSA genotype data was combined with WES data using PLINK 1.9. Variants with a MAF < 5% were removed. In total, the combination of GSA and exome data covered 7,798,353 variants for 397 patients with IBD (CD =234 and UC=166) and 218 Lifelines Deep individuals.

### **Prediction of IBD based on metabolomics profiles**

We used CoDaCoRe<sup>15</sup> (v 0.0.1) to identify ratios of metabolites and bacterial abundances that could predict IBD and its sub-phenotypes. Patients with a history of intestinal surgeries (n = 136) were excluded, and only highly prevalent metabolites (>70% of the samples) were considered in this analysis. Here, we first split the data into a training and a test set for each prediction, using 75% of the samples in the training process. Next, we estimated the added predictive value of using ratios of metabolites compared to a model including only host age, sex, BMI and faecal calprotectin levels (calprotectin levels >200  $\mu\text{g/g}$ , yes/no). Furthermore, we tested if the ratio of metabolite identified to discriminate between the samples from IBD and non-IBD participants had a predictive value in a group of less severe patients. Patients with a less severe IBD were defined as participants with calprotectin <200 $\mu\text{g/g}$  and SSCAI <2.5 or Harvey Bradshaw<5 at the time of sampling and no records of active disease periods 1 year prior and 1 year post sample collection.

Next, we explored the levels of the predictive metabolites in a separate cohort of samples from the Human Microbiome Project 2 (HMP2)<sup>9</sup>. Data was obtained through the Metabolomics Workbench portal (<https://www.metabolomicsworkbench.org>). Due

to the differences in metabolomic platforms and metabolite annotation libraries, we encountered some challenges in aligning the metabolites found in our study with those reported in the HMP2 cohort. For example, lactosyl-N-palmitoyl-sphingosine was not annotated in their data, but we identified a structurally similar molecule, N-palmitoyl-sphingosine or Cer(d18:1/16:0), which showed a strong correlation with lactosyl-N-palmitoyl-sphingosine levels in our dataset (Spearman correlation,  $\rho = 0.70$ ). To further validate our findings, we compared the ratio Cer(d18:1/16:0) / L-urobilin between IBD and non-IBD samples at each time point where at least 5 non-IBD samples were available.

### **Co-occurrence patterns between bacteria and metabolites**

The *QIIME*<sup>6</sup> implementation of *mmvec* v.1.0.6<sup>17</sup> was used to estimate the co-occurrence probabilities between highly prevalent metabolites and bacteria (**Suppl. Table 21**).

Furthermore, we assessed the associations between individual microbiome features (taxa, gene clusters and metabolic pathways) and metabolites using regression models. The association between metabolites levels and bacterial taxa were assessed using two different models: firstly, recoding bacteria as detected or undetected (1 and 0) and secondly, considering only non-zero abundance value. For bacterial pathways and gene clusters only the second approach was used. In addition to the previously mentioned confounders (age, sex, BMI, sample storage time, batch, amount of faecal material, estimate bowel movements a day and intestinal resections), dysbiosis (yes/no) and disease phenotype (CD, UC, non-IBD) were also included as covariates in the model. Finally, we additionally tested context-specific effects by adding an interaction factor between microbial features and dysbiosis as predictor in the model.

### **Association between metabolites and phenotypes**

An association analysis between phenotypes and metabolites was performed within each cohort (controls, CD and UC). We included information about lifestyle, including use of 31 different types of medication, dietary patterns represented by 144 food frequency-related scores and the levels of 3 faecal biomarkers (faecal calprotectin, chromogranin A and human beta-defensin) (see *Phenotypes selection* section). Each

phenotype–metabolite combination was tested using linear regression, including age, sex, BMI, bowel movements per day and technical factors as covariates.

### **Mediation analysis**

To establish if associations between phenotypes and metabolites could be related to the intestinal microbiota, we performed a mediation analysis in each cohort (CD, UC and controls). Phenotypes were considered exposures and metabolites outcomes. For each phenotype with at least one significant association with a metabolite (FDR<0.05) we first selected the potential mediators by correlating the phenotype with bacterial abundances. Exposures, mediators, and outcomes were standardized prior to analysis and the impact of confounders (age, sex, BMI, estimate bowel movements a day, sample storage time (month), batch, sequencing read depth) was regressed in both mediators and outcomes. Because multiple bacteria can mediate in the same phenotype-metabolite relation, we used the *regmed* R's package (v. 2.0.5) to perform a regularized mediation analysis. This approach allows the input of multiple features as mediators, selecting the most relevant factors in the exposure-outcome relation. Additionally, for each mediated association, we also estimated the proportion of mediated effects using the *mediation* (v. 4.5) package in R.

### **Differential abundance analyses of faecal microbiome features**

Linear regression analysis was used to identify microbiome features (taxa, pathways and metabolic gene clusters, **Suppl. Table 22**) that differed between controls and IBD. Age, sex, BMI, average bowel movements per day, history of intestinal resections (yes/no) and sequencing read depth were included as covariates in the regression models.

### **Metabolite levels prediction**

For each of the metabolites and in each of the 8 defined models, we performed a 5-fold cross-validation (CV) procedure to select the best set of predictors based on the mean of squared errors. A 10-fold CV step was used in each of the CV-training sets to tune the lasso penalty parameter ( $\lambda$ ) in the lasso regression. Using the estimates of the model minimising the mean of squared errors, we computed the  $R^2$

coefficient in the whole dataset. We defined 8 different models representing different data categories available in both cohorts (IBD and non-IBD samples).

- 1) Host and technical factors: Which included information about the sex, age, BMI, average bowel movements per day, storage time at -80°C, batch and amount in grams of sample used for measuring metabolomics. All other models also included these variables to consider confounders' effects.
- 2) Diet: 119 dietary food patterns adjusted by total caloric intake.
- 3) Biomarkers: The levels of chromogranin A, human-beta defensin 2 and faecal calprotectin levels above 200 (yes/no).
- 4) Medication: The use of 22 medication categories (yes/no).
- 5) Disease: IBD (yes/no)
- 6) Taxa abundance: Relative abundance of 109 microbial species.
- 7) Bacterial pathways: 326 MetaCyc pathways
- 8) All: A model containing all variables described in the previous model.



**REFERENCES**

1. Klaassen, M. A. Y. *et al.* Anti-inflammatory Gut Microbial Pathways Are Decreased During Crohn's Disease Exacerbations. *Journal of Crohn's & colitis* (2019) doi:10.1093/ecco-jcc/jjz077.
2. Bolte, L. A. *et al.* Long-term dietary patterns are associated with pro-inflammatory and anti-inflammatory features of the gut microbiome. *Gut* **70**, 1287–1298 (2021).
3. Siebelink, E., Geelen, A. & Vries, J. H. M. de. Self-reported energy intake by FFQ compared with actual energy intake to maintain body weight in 516 adults. *British Journal of Nutrition* **106**, 274–281 (2011).
4. Willett, W. C., Howe, G. R. & Kushi, L. H. Adjustment for total energy intake in epidemiologic studies. *The American Journal of Clinical Nutrition* **65**, 1220S-1228S (1997).
5. Beghini, F. *et al.* Integrating taxonomic, functional, and strain-level profiling of diverse microbial communities with bioBakery 3. *eLife* **10**, e65088 (2021).
6. Wood, D. E., Lu, J. & Langmead, B. Improved metagenomic analysis with Kraken 2. *Genome Biology* **20**, 257 (2019).
7. Andreu, V. P. *et al.* A systematic analysis of metabolic pathways in the human gut microbiota. *bioRxiv* 2021.02.25.432841 (2021) doi:10.1101/2021.02.25.432841.
8. Andreu, V. P. *et al.* BiG-MAP: an Automated Pipeline To Profile Metabolic Gene Cluster Abundance and Expression in Microbiomes. *mSystems* (2021) doi:10.1128/mSystems.00937-21.
9. Lloyd-Price, J. *et al.* Multi-omics of the gut microbial ecosystem in inflammatory bowel diseases. *Nature* **569**, 655 (2019).
10. Teslovich, T. M. *et al.* Biological, clinical and population relevance of 95 loci for blood lipids. *Nature* **466**, 707–713 (2010).
11. Karczewski, K. J. *et al.* The mutational constraint spectrum quantified from variation in 141,456 humans. *Nature* **581**, 434–443 (2020).

12. Purcell, S. *et al.* PLINK: A Tool Set for Whole-Genome Association and Population-Based Linkage Analyses. *The American Journal of Human Genetics* **81**, 559–575 (2007).
13. Loh, P.-R. *et al.* Reference-based phasing using the Haplotype Reference Consortium panel. *Nat Genet* **48**, 1443–1448 (2016).
14. Das, S. *et al.* Next-generation genotype imputation service and methods. *Nat Genet* **48**, 1284–1287 (2016).
15. Gordon-Rodriguez, E., Quinn, T. P. & Cunningham, J. P. Learning sparse log-ratios for high-throughput sequencing data. *Bioinformatics* **38**, 157–163 (2022).
16. Bolyen, E. *et al.* Reproducible, interactive, scalable and extensible microbiome data science using QIIME 2. *Nat Biotechnol* **37**, 852–857 (2019).
17. Morton, J. T. *et al.* Learning representations of microbe–metabolite interactions. *Nat Methods* 1–9 (2019) doi:10.1038/s41592-019-0616-3.
