# Supplementary material for: Faecal metabolome and its determinants in inflammatory bowel disease
Source: PubMed Central journal article supplement — Gut. 2023 Mar 23;72(8):1472–85. doi: 10.1136/gutjnl-2022-328048 (PMC10359577; doi:10.1136/gutjnl-2022-328048), 2023-03-23
Supplement: gutjnl-2022-328048supp004.pdf [file gutjnl-2022-328048supp004.pdf]

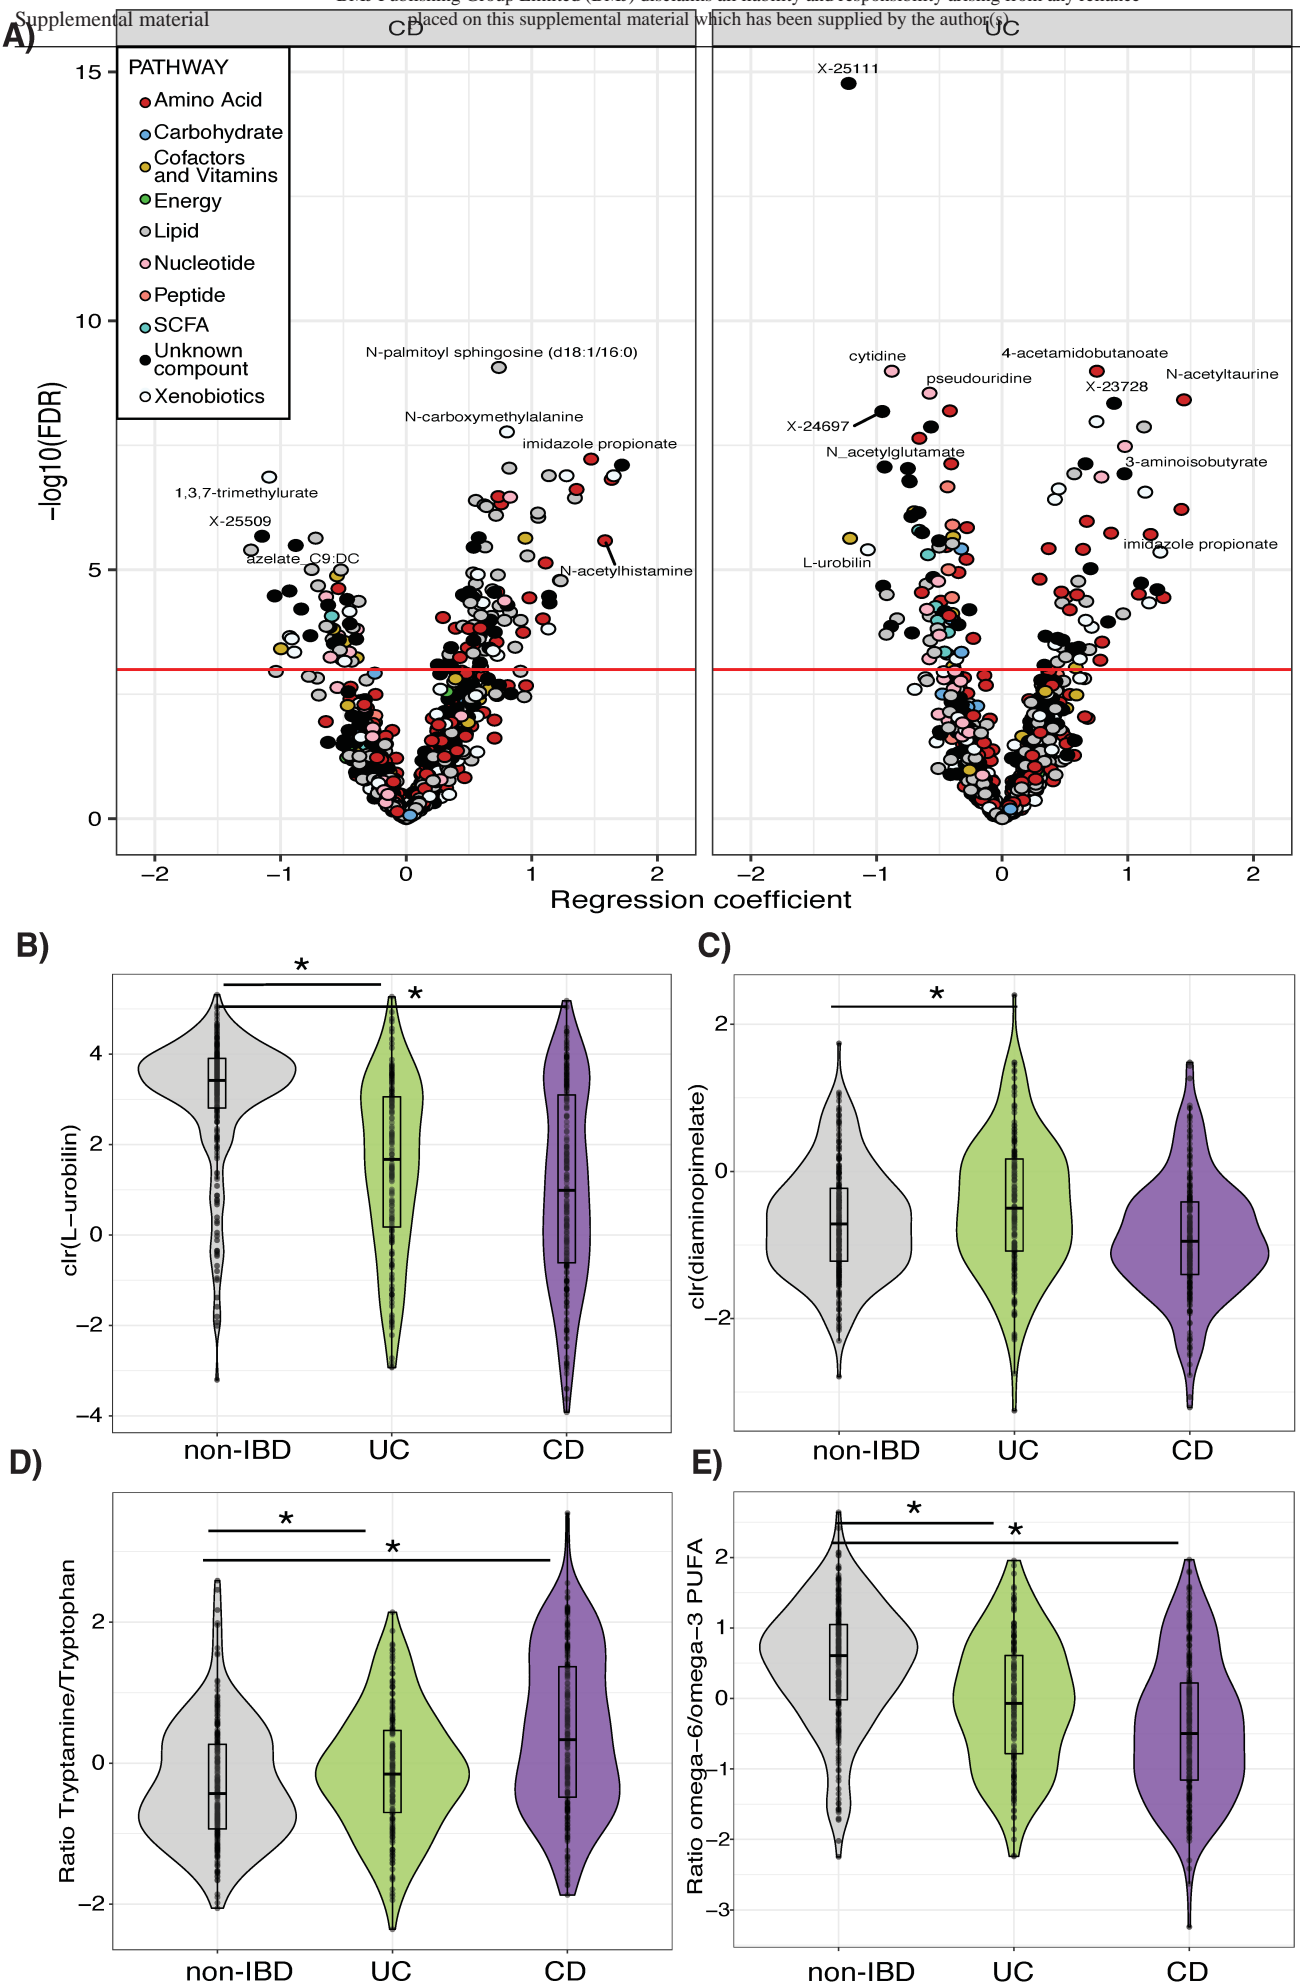

**Suppl. Figure 1. Metabolites associated with CD and UC.** **A.** Volcano plot showing the p-value (y-axis) and regression coefficients (x-axis) of the association analyses between cases (CD and UC) and non-IBD controls. Dot colour indicates the pathway annotation provided by Metabolon. **B-C.** Levels of L-urobilin and diaminopimelate stratified by disease phenotype. Metabolite levels are clr-transformed. L-urobilin is significantly decreased in both UC and CD and diaminopimelate significantly increased in UC. **D.** Log-ratio between tryptamine and tryptophan levels. This ratio was significantly increased in patients with CD. **E.** Patients with IBD show lower levels of the log-ratio between omega-6 and omega-3 polyunsaturated fatty acids. Asterisks indicate significant differences between groups (FDR < 0.05).
