# Supplementary material for: Faecal metabolome and its determinants in inflammatory bowel disease
Source: HighWire-hosted journal article supplement (doi:10.1136/gutjnl-2022-328048), 2023-03-23

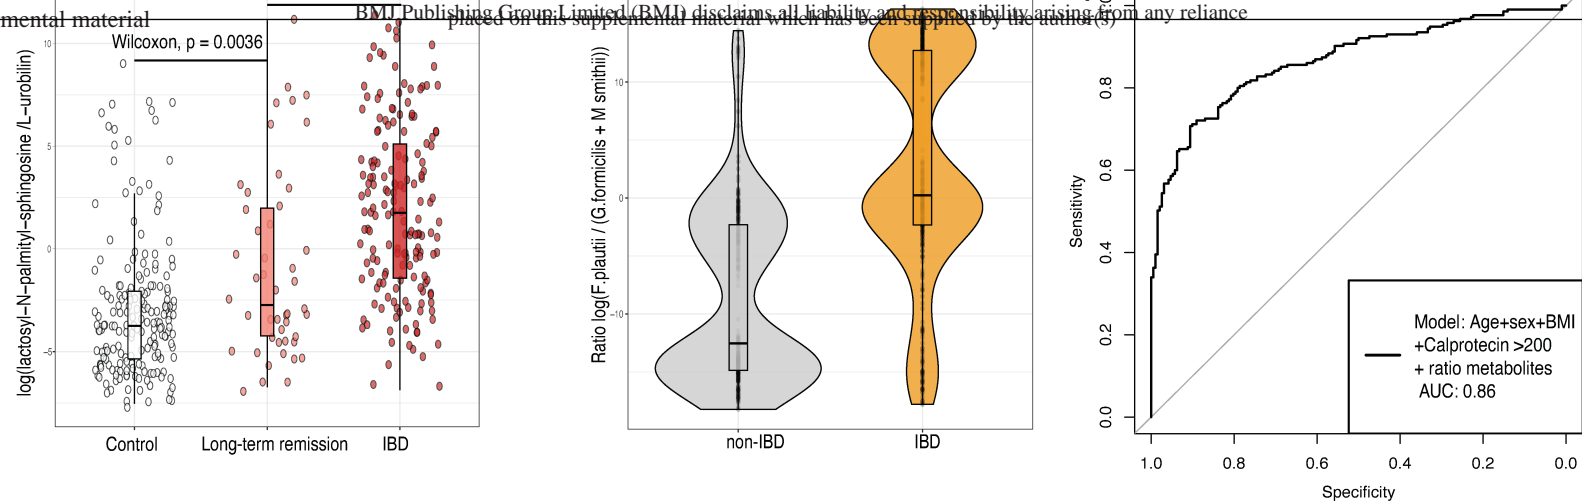

Supplement: gutjnl-2022-328048supp006_data_supplement.pdf [file gutjnl-2022-328048supp006_data_supplement.pdf]
