# Supplementary material for: Faecal metabolome and its determinants in inflammatory bowel disease
Source: PubMed Central journal article supplement — Gut. 2023 Mar 23;72(8):1472–85. doi: 10.1136/gutjnl-2022-328048 (PMC10359577; doi:10.1136/gutjnl-2022-328048), 2023-03-23
Supplement: gutjnl-2022-328048supp007.pdf [file gutjnl-2022-328048supp007.pdf]

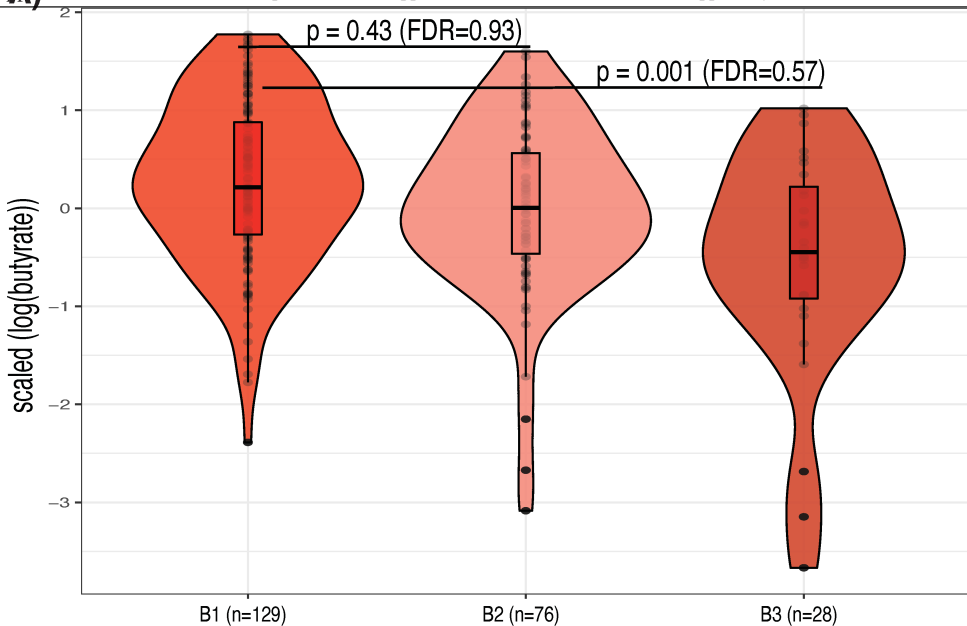

Montreal B

**B)**

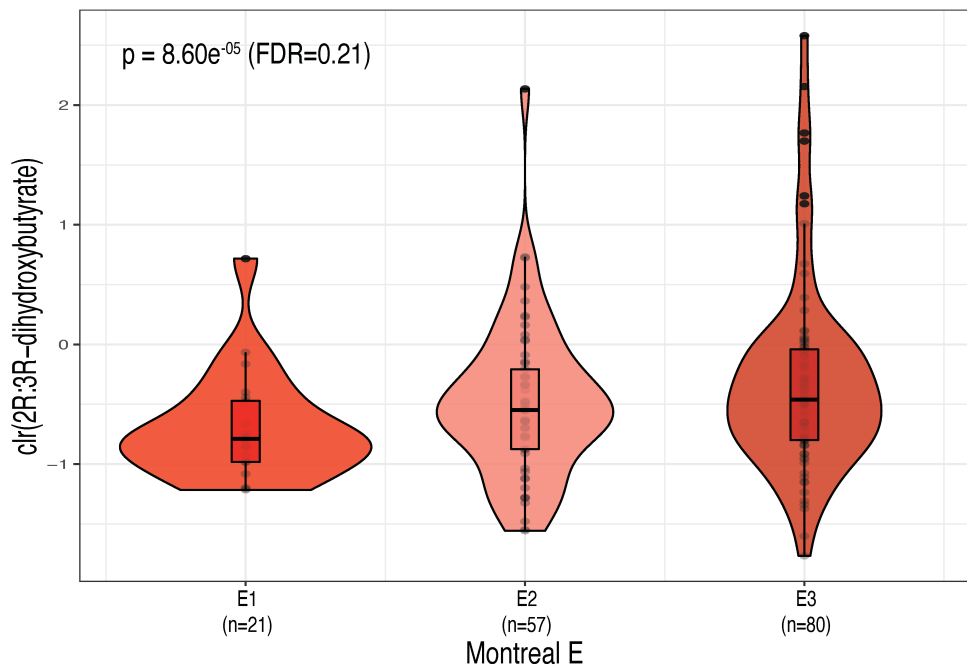

**Suppl. Figure 4. Metabolite levels stratified by disease and patient characteristics.** **A.** Levels of butyrate are lower in patients with CD and penetrating disease (Montreal B3) compared to non-structuring and non-penetrating forms of the disease (Montreal B1). **B.** In patients with UC, levels of 2R:3R-dihydroxybutyrate show a tendency to positively correlate with disease extension.
