# Supplementary material for: Faecal metabolome and its determinants in inflammatory bowel disease
Source: PubMed Central journal article supplement — Gut. 2023 Mar 23;72(8):1472–85. doi: 10.1136/gutjnl-2022-328048 (PMC10359577; doi:10.1136/gutjnl-2022-328048), 2023-03-23
Supplement: gutjnl-2022-328048supp008.pdf [file gutjnl-2022-328048supp008.pdf]

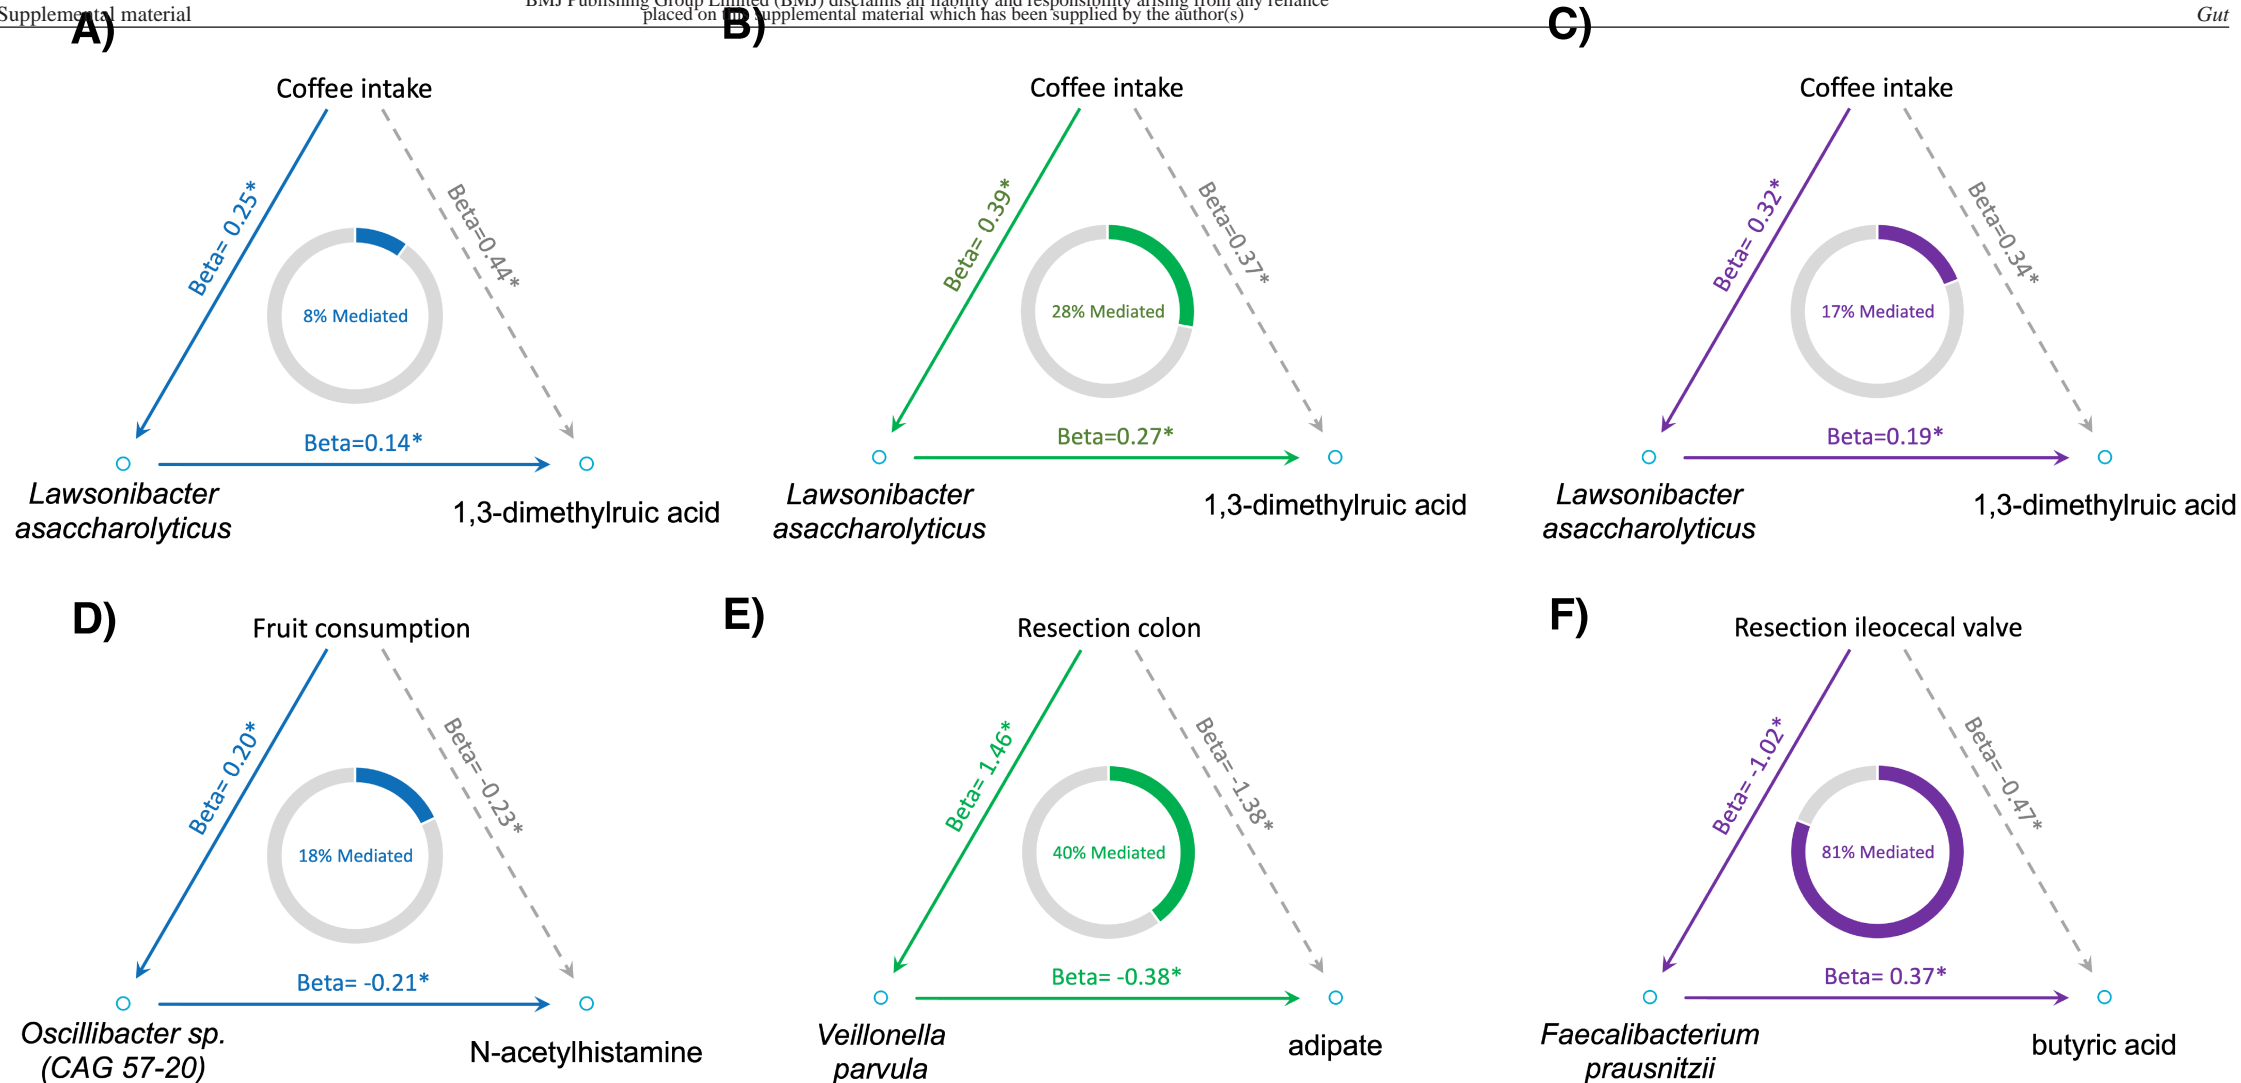

**Suppl. Figure 5. Graphical representation of the phenotype-metabolite mediated effects by the gut microbiota.** Arrows indicate the directionality of the association with beta coefficients of the regression analyses. The middle pie-chart represents the proportion of mediated effect, i.e average causal mediation effect divided by the total effect. **A-C** *Lawsonibacter asaccharolyticus* partially mediates the association between coffee intake and the levels of 1,3-dimethylruic acid in faeces. Similar effects are observed in non-IBD controls (blue), participants with UC (green) and CD (purple). **D.** In controls, *Oscillibacter sp* mediates the association between fruit consumption and N-acetylhistamine. **E.** Colonic resections negatively impact adipate levels via the impact in the abundance of *V.parvula*. **F.** Resection of the ileocecal valve is associated with lower abundances of *F.prausnitzii* having an impact on butyrate levels in faeces. Asterisks indicate significant associations (FDR < 0.05, Suppl. Table 14).
