# Supplementary material for: Faecal metabolome and its determinants in inflammatory bowel disease
Source: PubMed Central journal article supplement — Gut. 2023 Mar 23;72(8):1472–85. doi: 10.1136/gutjnl-2022-328048 (PMC10359577; doi:10.1136/gutjnl-2022-328048), 2023-03-23
Supplement: gutjnl-2022-328048supp010.pdf [file gutjnl-2022-328048supp010.pdf]

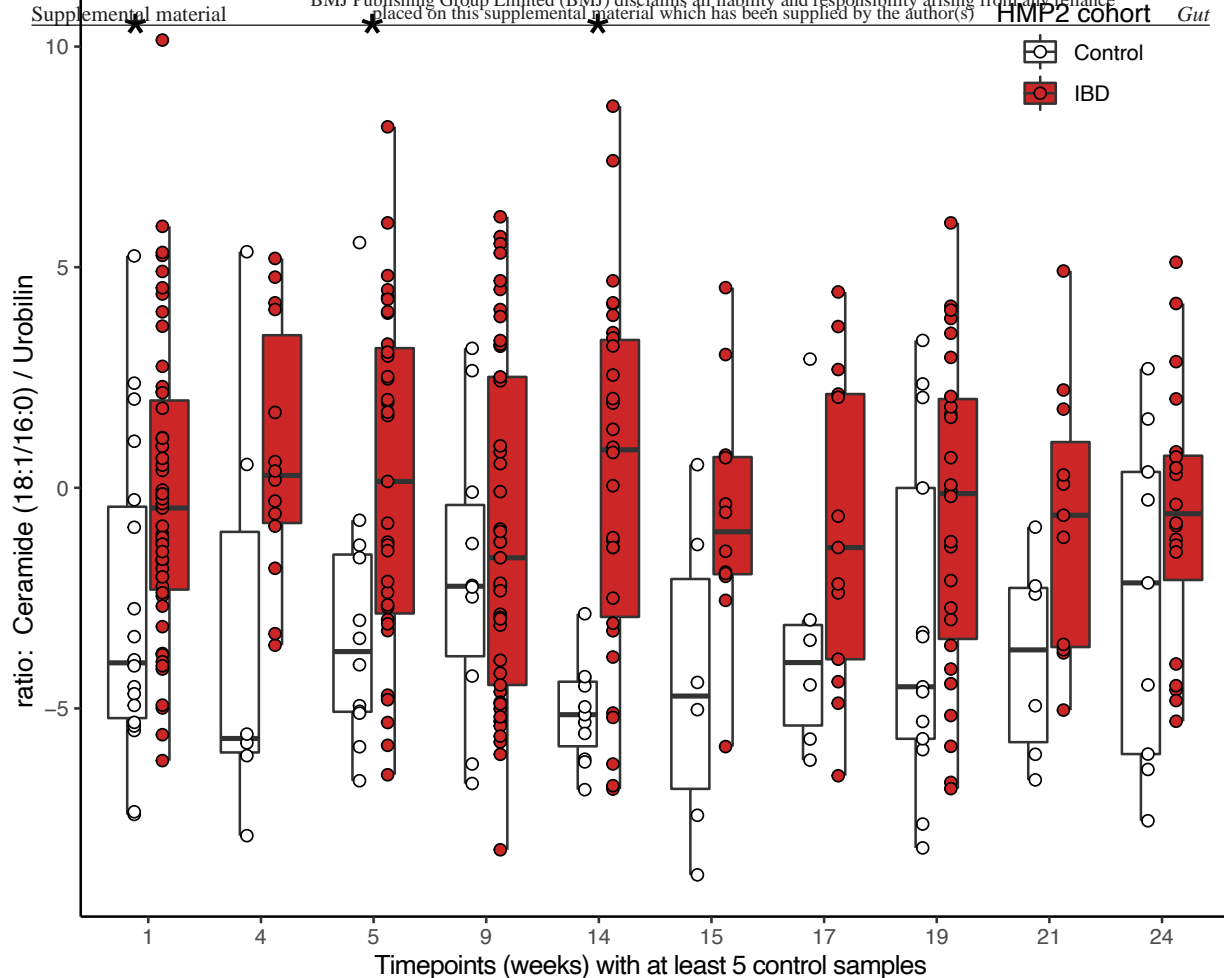

**Suppl. Figure 7. The ratio between a ceramide and urobilin in an independent cohort.** Boxplots showing the log ratio between a ceramide and urobilin in the HMP2 cohort. X-axis represent the time-point in which samples were collected (weeks) and the y-axis the log ratio of the selected metabolites. Samples from participants with IBD (red) consistently show higher levels of this ratio across time-points. Timepoints displayed contain at least 5 non-IBD samples (white) Asterisks indicate significant associations ( $p < 0.05$ , Wilcoxon-test).
