# Supplementary figures and images for: Faecal metabolome and its determinants in inflammatory bowel disease
Source: HighWire-hosted journal article supplement (doi:10.1136/gutjnl-2022-328048), 2023-03-23

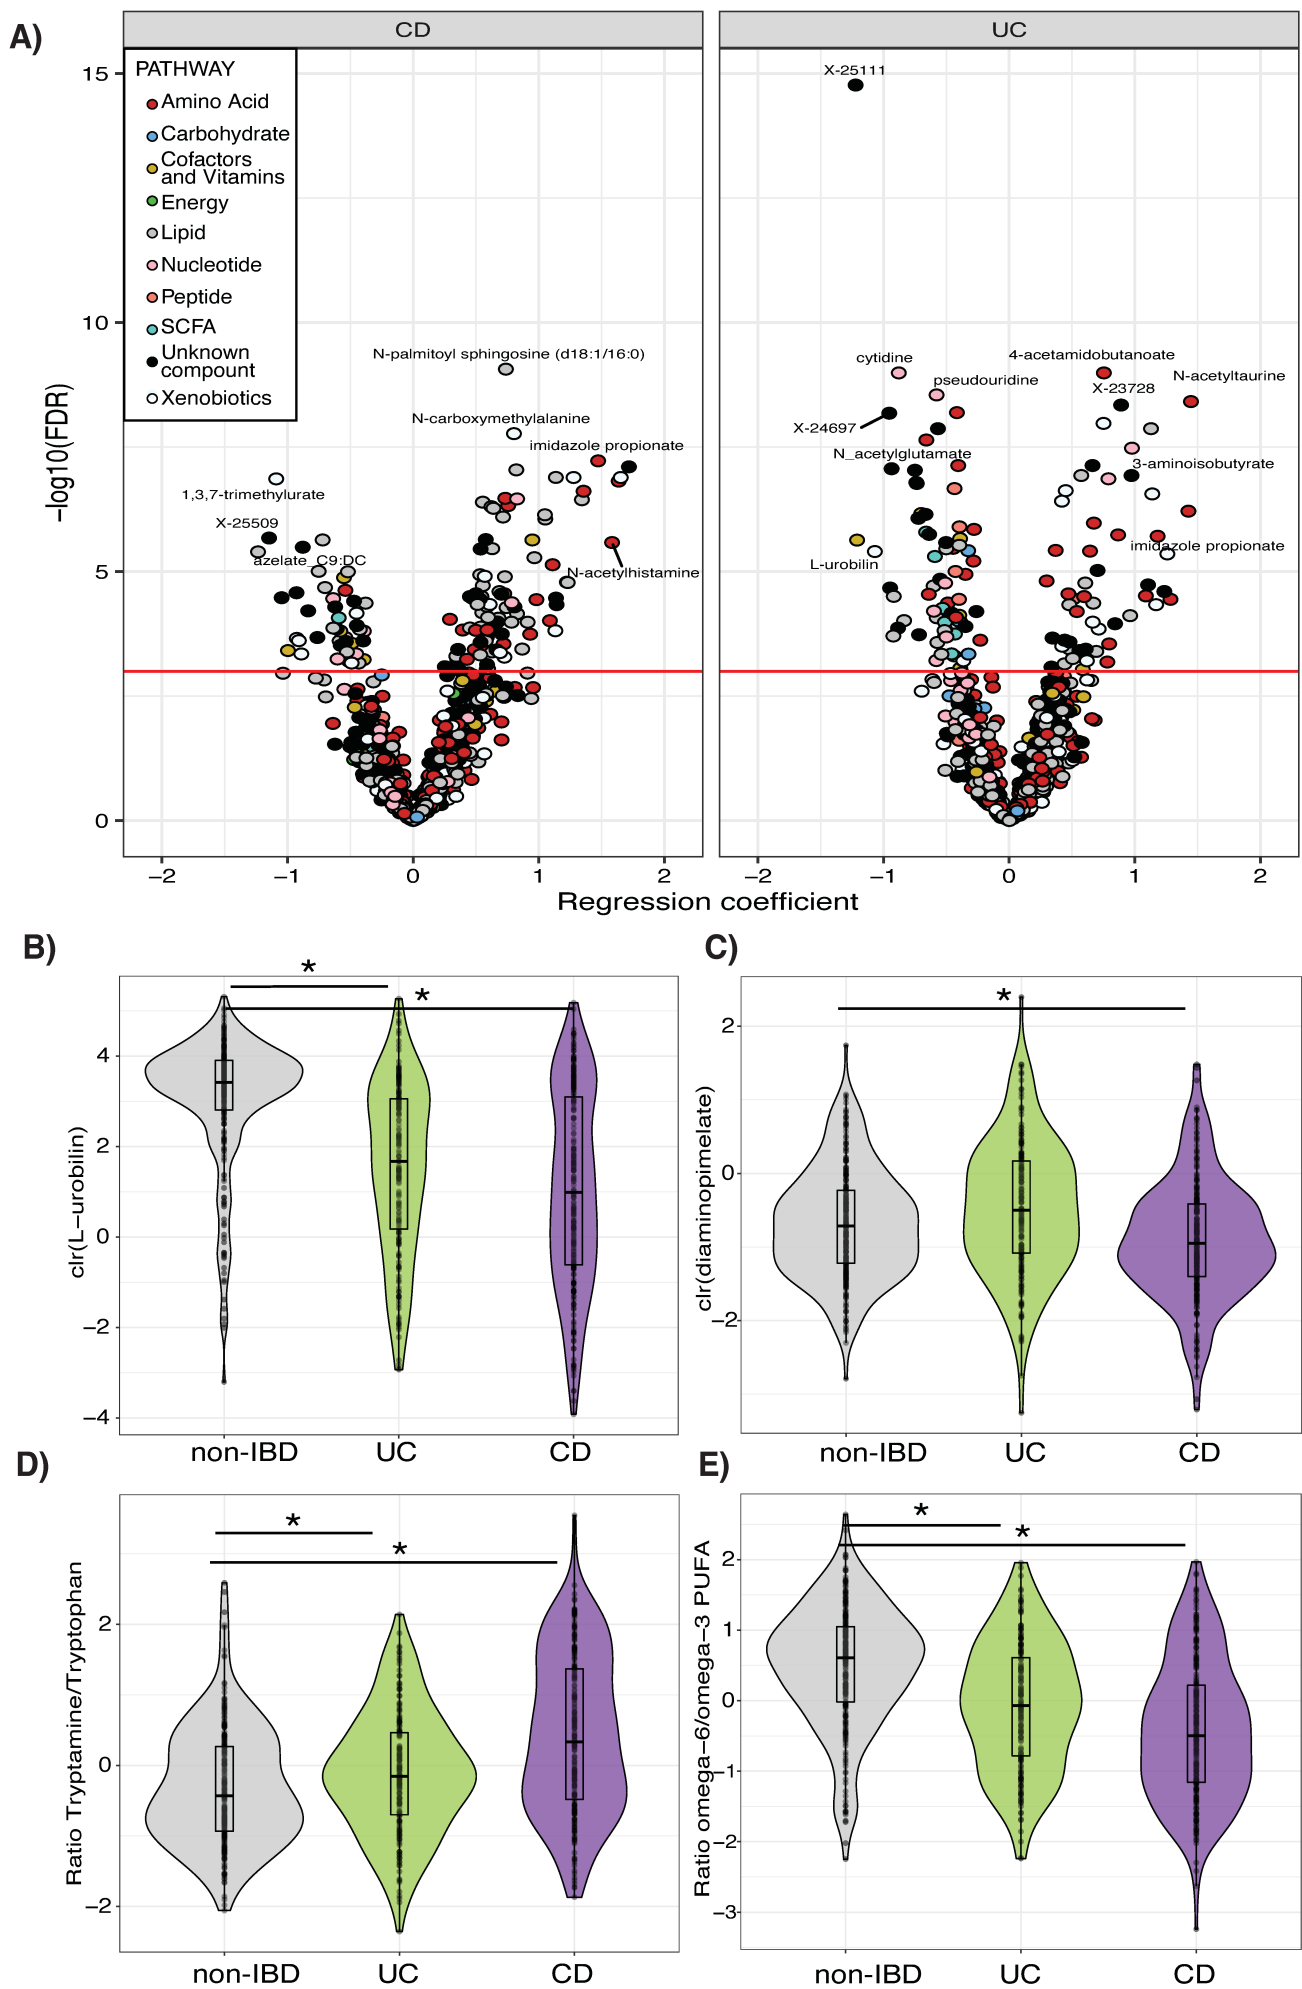

Supplement: gutjnl-2022-328048supp004_data_supplement.pdf [file gutjnl-2022-328048supp004_data_supplement.pdf]

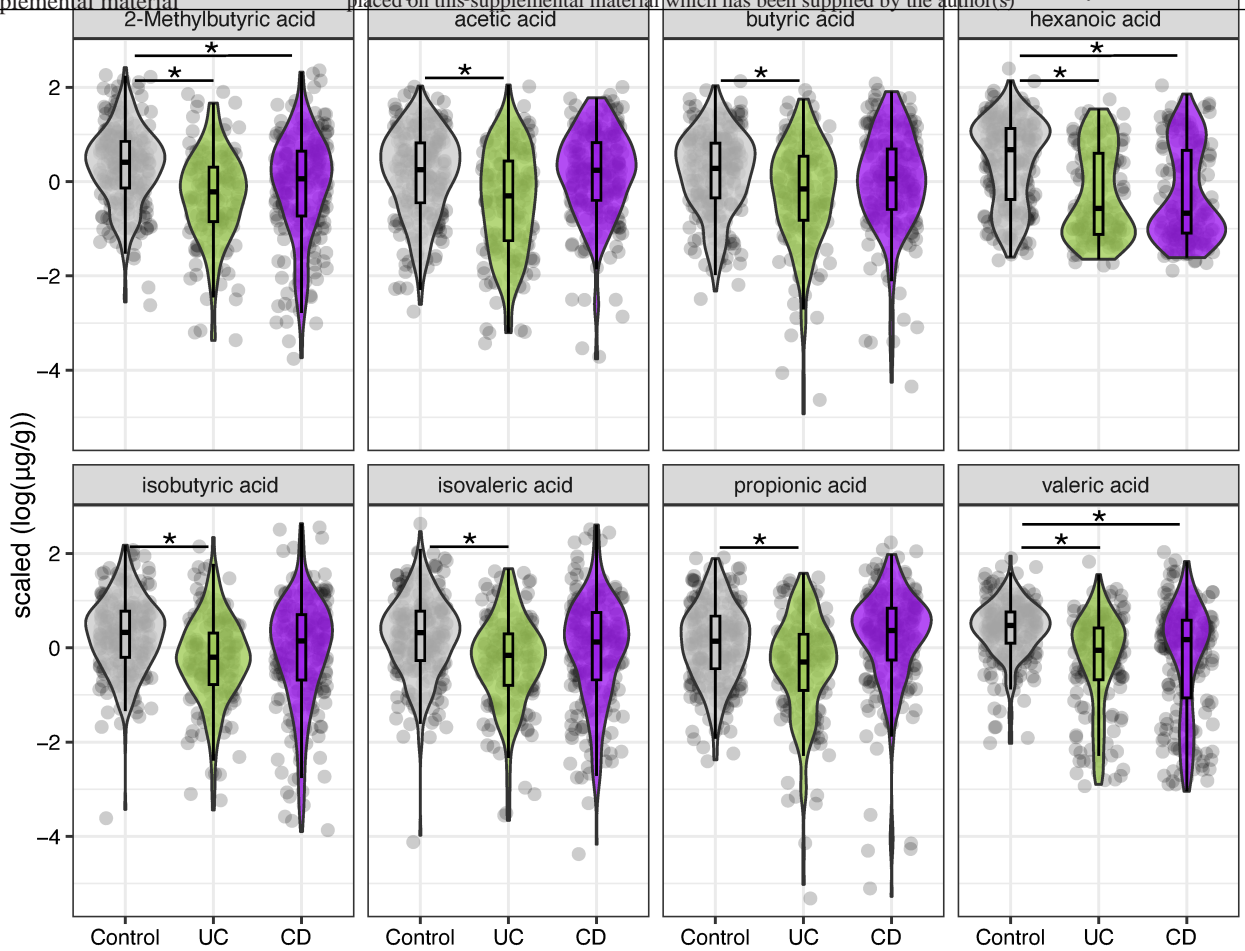

Supplement: gutjnl-2022-328048supp005_data_supplement.pdf [file gutjnl-2022-328048supp005_data_supplement.pdf]

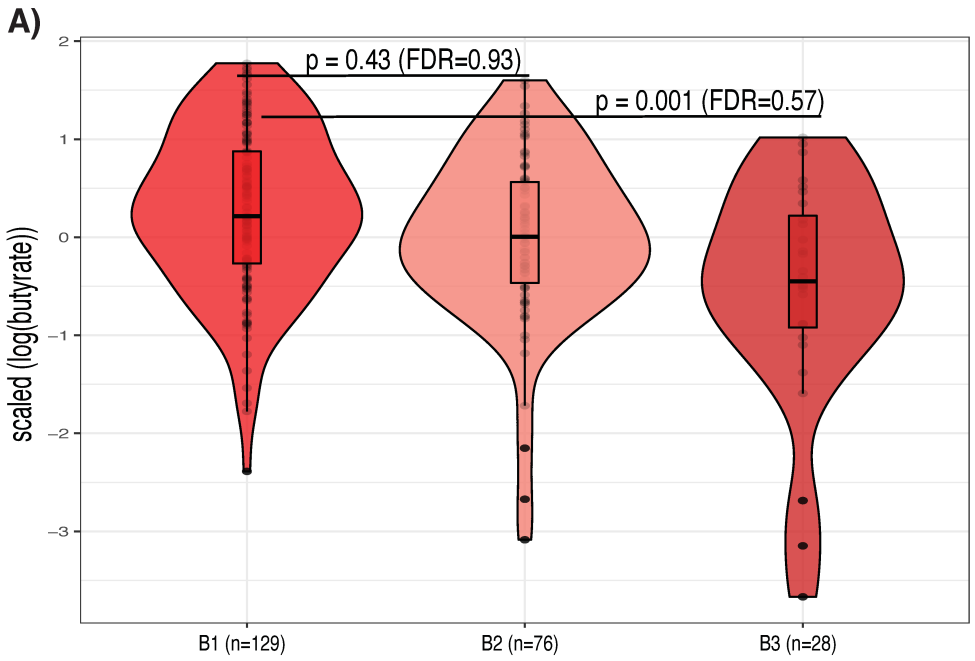

## Montreal B

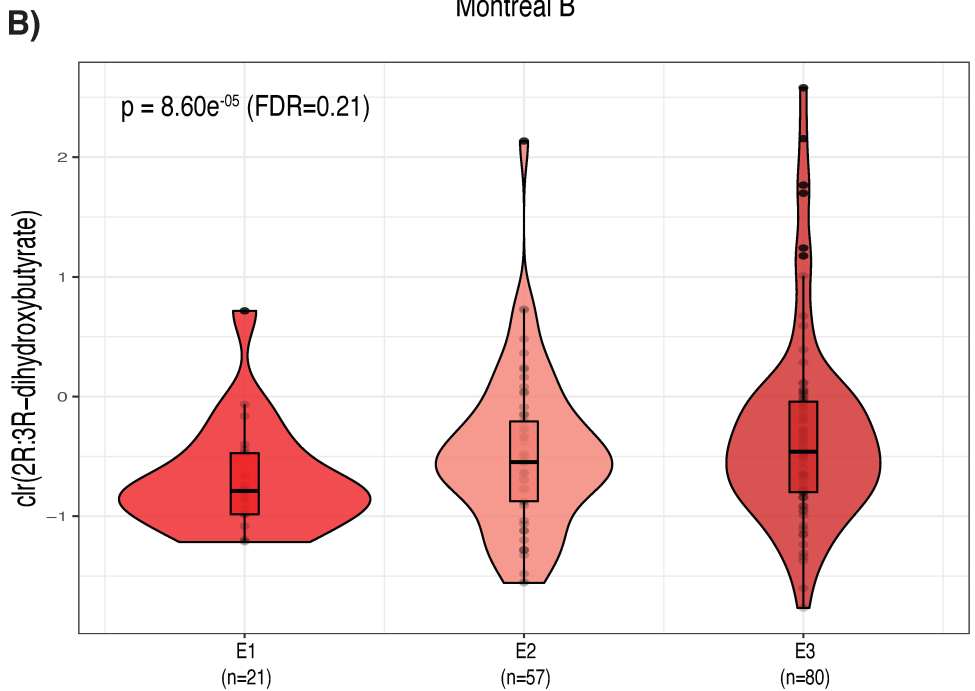

## Montreal E

Supplement: gutjnl-2022-328048supp007_data_supplement.pdf [file gutjnl-2022-328048supp007_data_supplement.pdf]

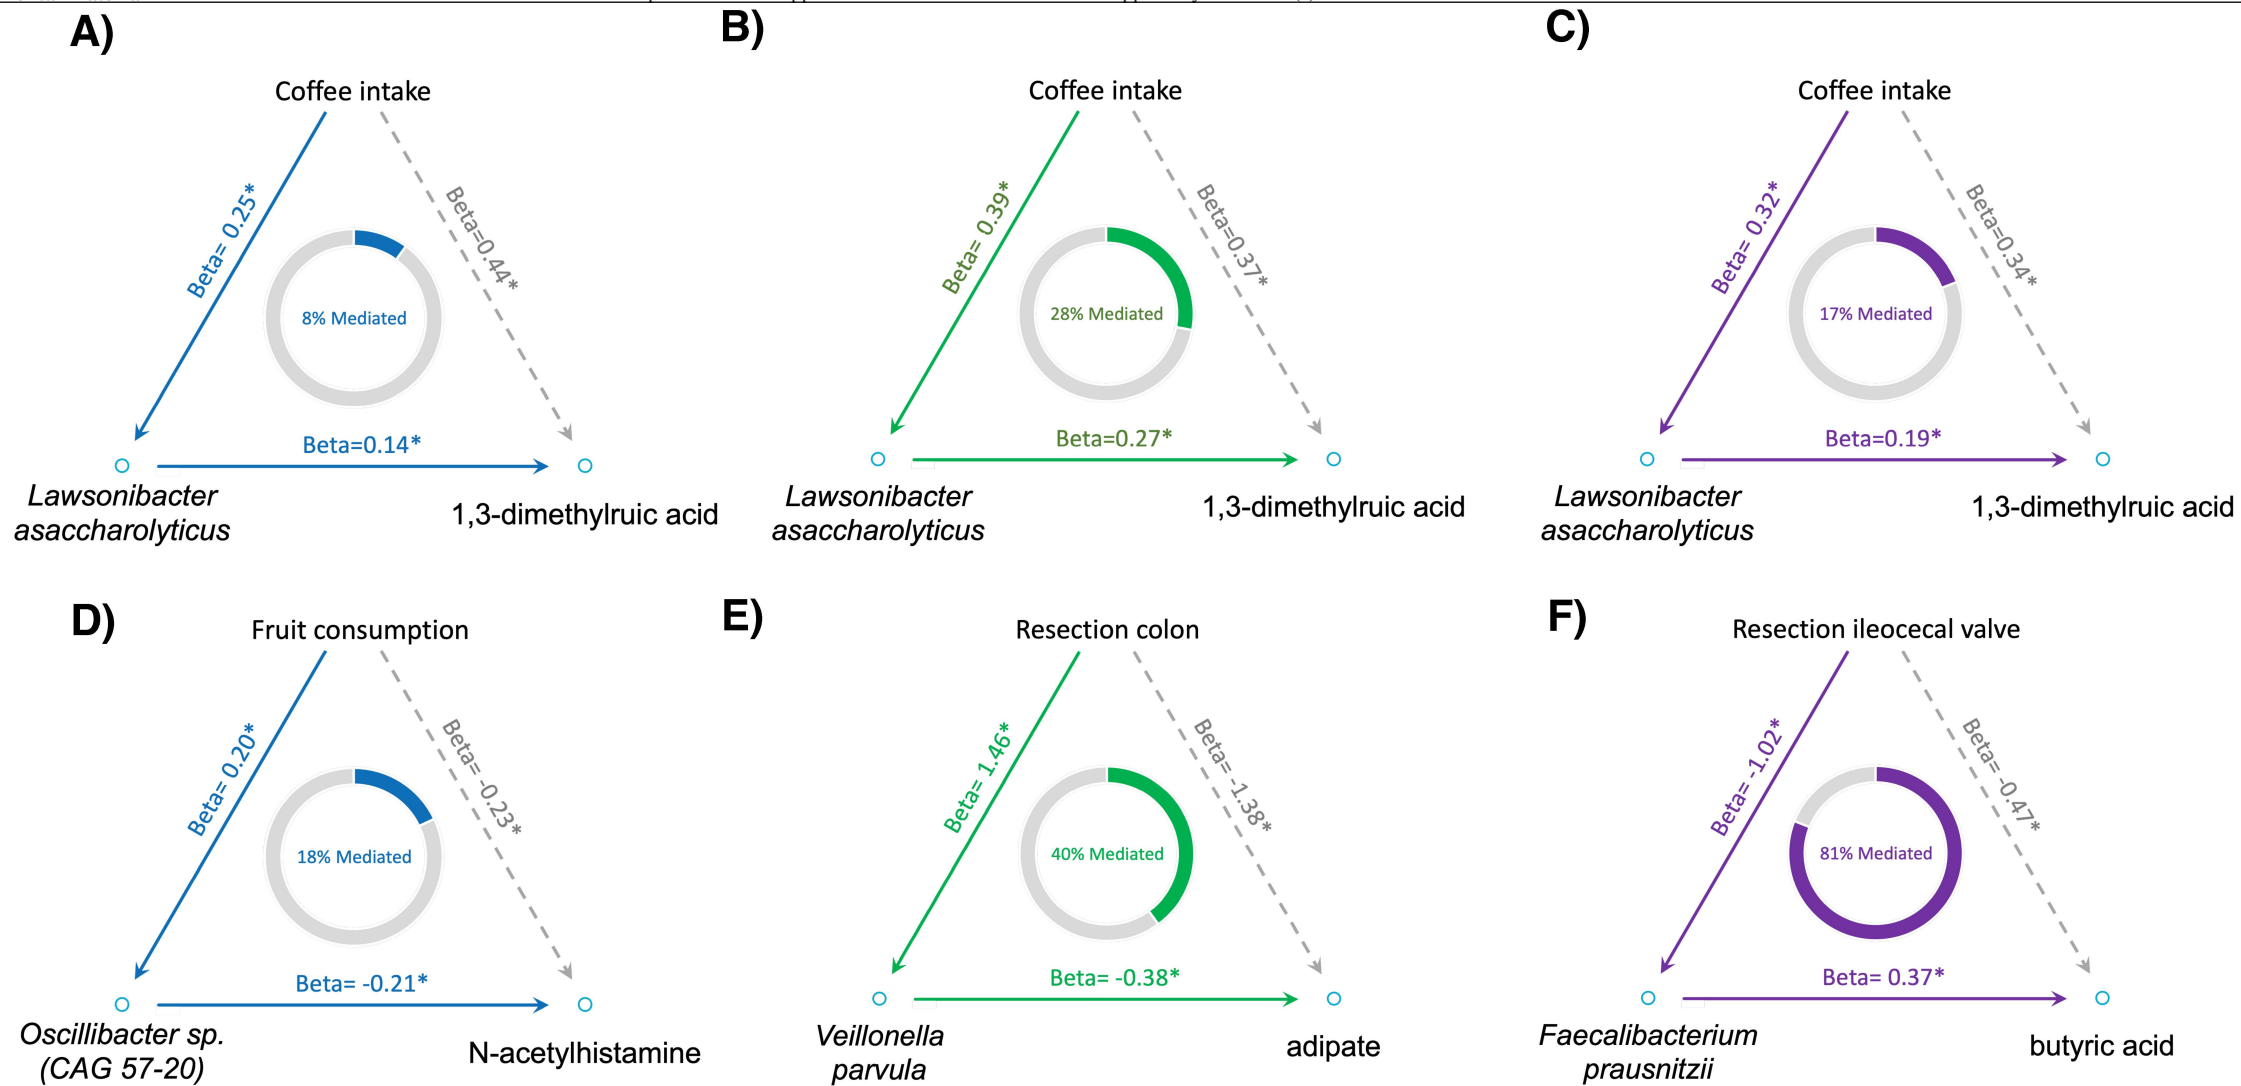

Supplement: gutjnl-2022-328048supp008_data_supplement.pdf [file gutjnl-2022-328048supp008_data_supplement.pdf]

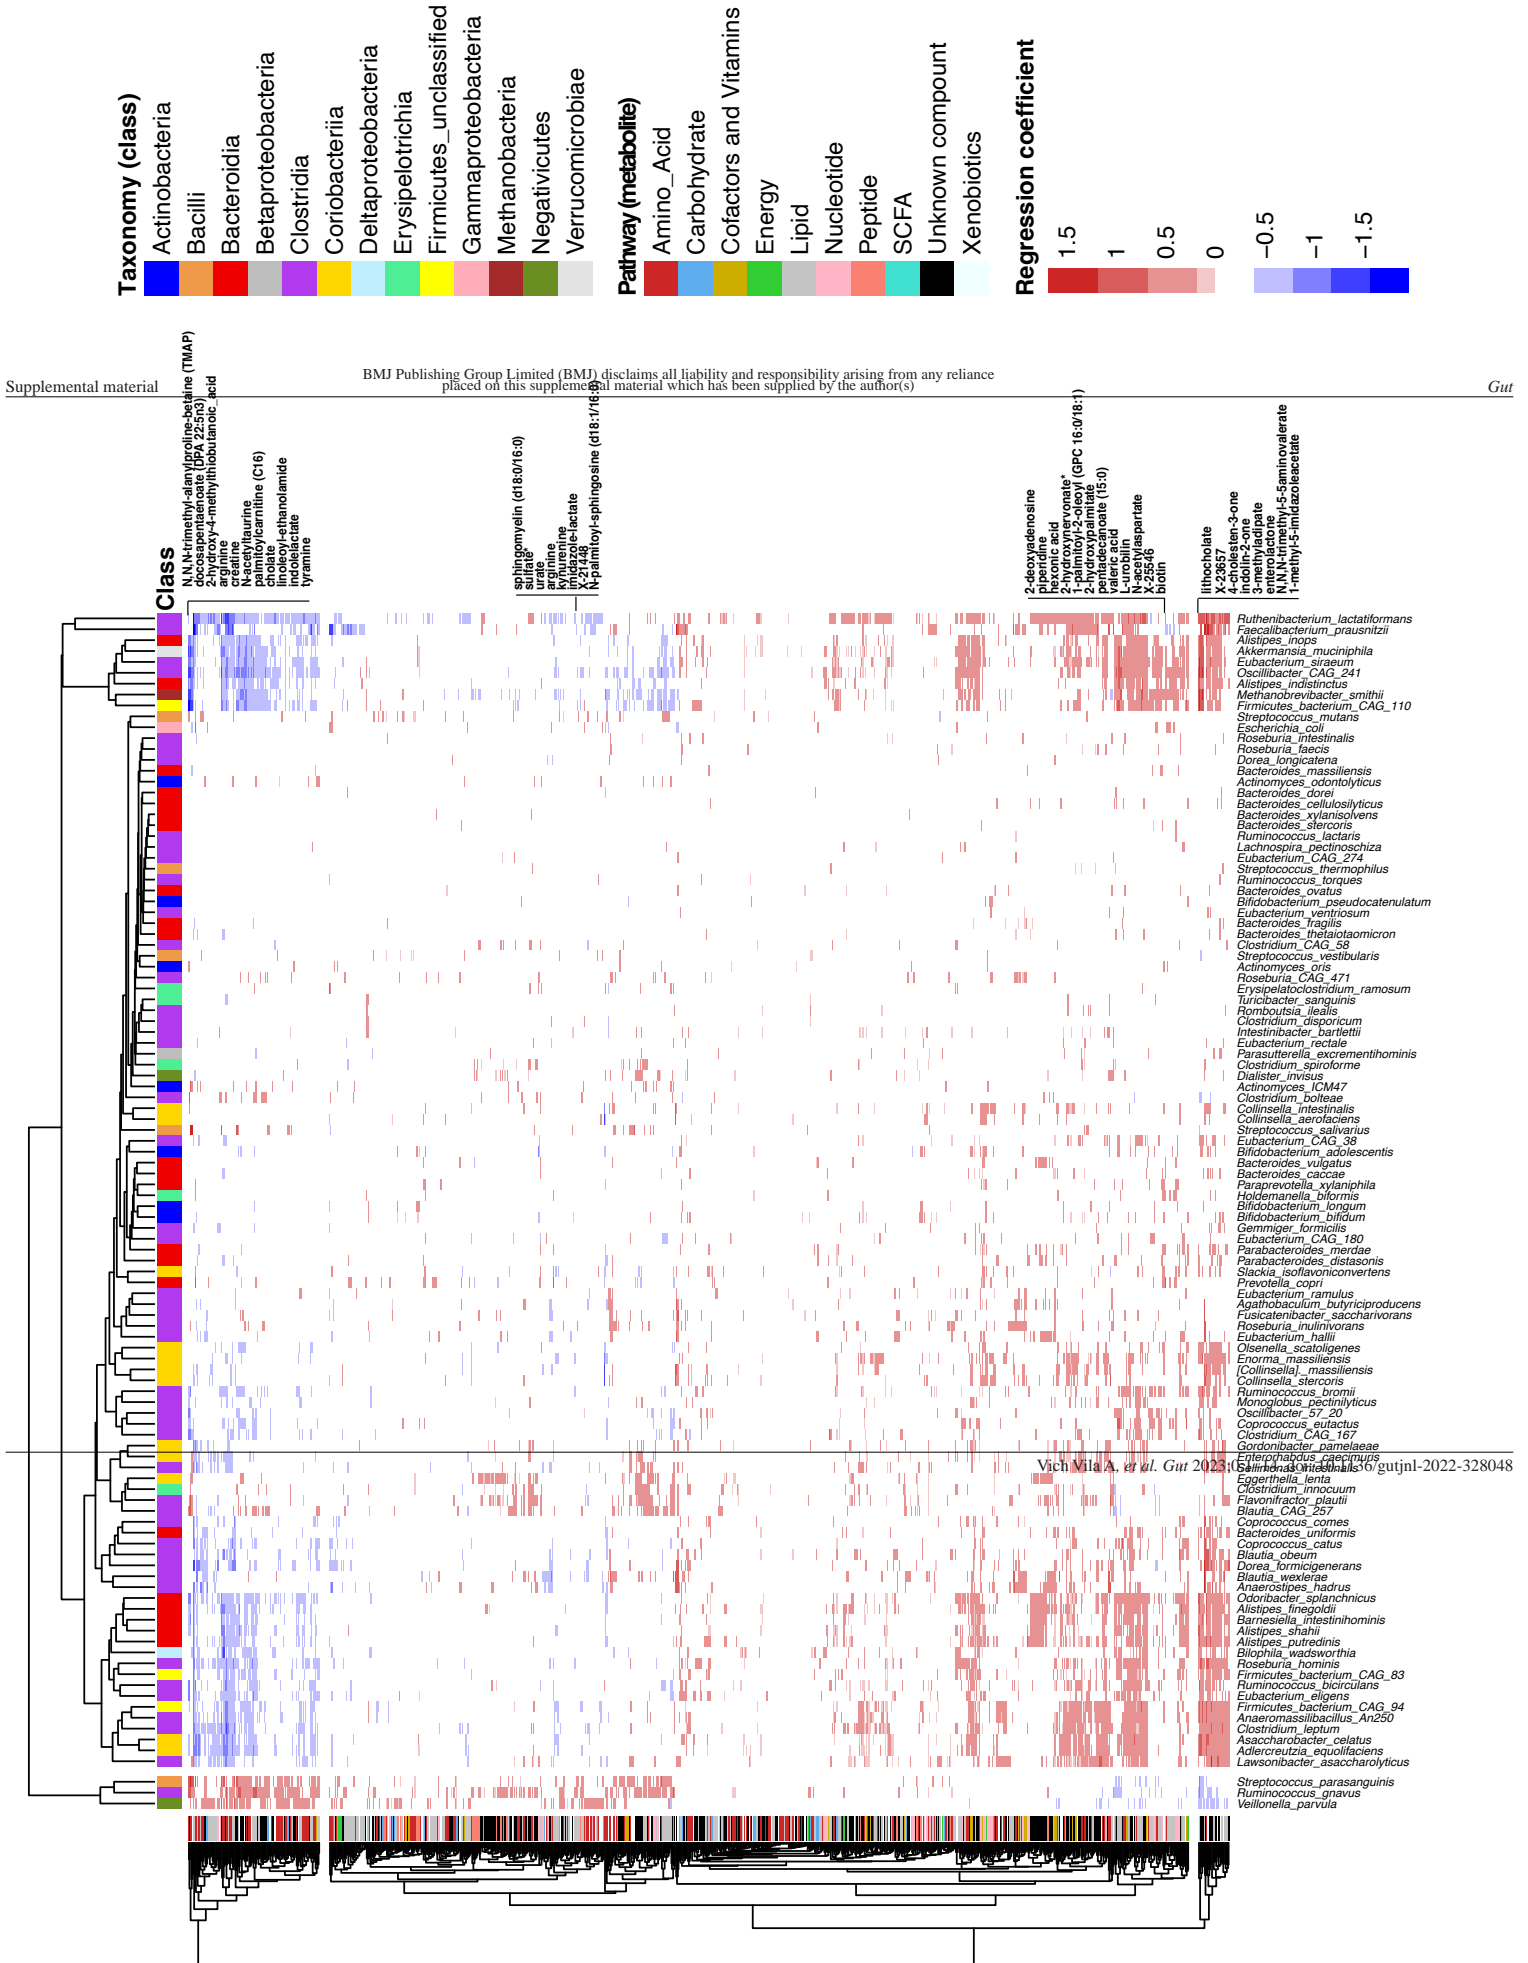

Supplement: gutjnl-2022-328048supp009_data_supplement.pdf [file gutjnl-2022-328048supp009_data_supplement.pdf]

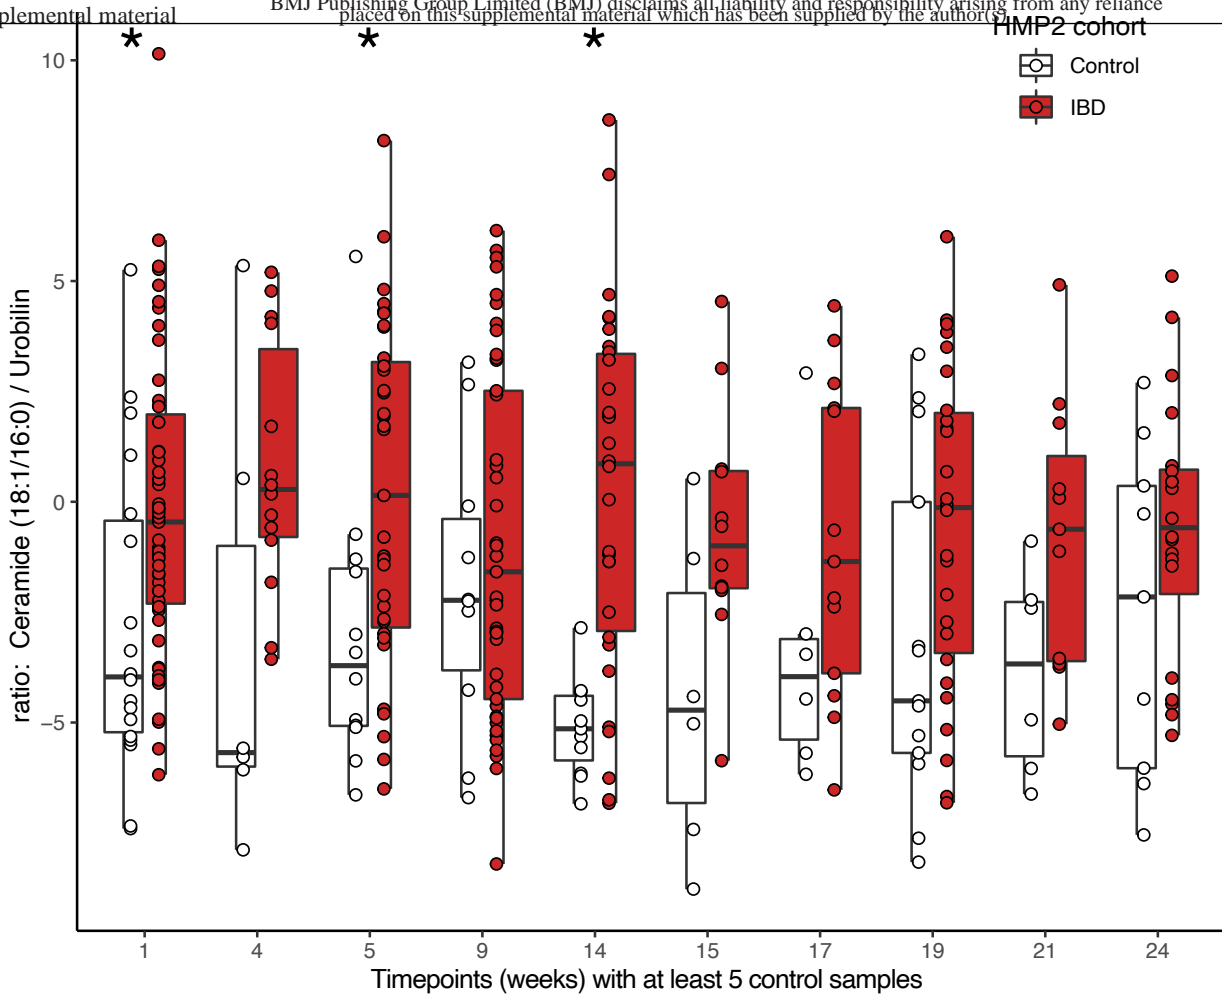

Supplement: gutjnl-2022-328048supp010_data_supplement.pdf [file gutjnl-2022-328048supp010_data_supplement.pdf]
